# Supplementary material for: A paper-supported sandwich immunosensor based on upconversion luminescence resonance energy transfer for the visual and quantitative determination of a cancer biomarker in human serum
Source: Royal Society of Chemistry journal article supplement (doi:10.1039/c9an02307k), 2020-01-01
Supplement: c9an02307k1.pdf [file c9an02307k1.pdf]

## Supporting Information

### **A paper-supported sandwich immunosensor based on upconversion luminescence resonance energy transfer for the visual and quantitative determination of a cancer biomarker in human serum**

Mengyuan He,<sup>\*a</sup> Ning Shang,<sup>a</sup> Lin Shen,<sup>b</sup> and Zhihong Liu,<sup>\*b</sup>

a. College of Chemistry and Chemical Engineering, Xinyang Normal University, Xinyang 464000, China

b. Key Laboratory of Analytical Chemistry for Biology and Medicine (Ministry of Education), College of Chemistry and Molecular Sciences, Wuhan University, Wuhan 430072, China

\*Correspondence author. Email: myhe@xynu.edu.cn (M. He); zhliu@whu.edu.cn (Z. Liu)

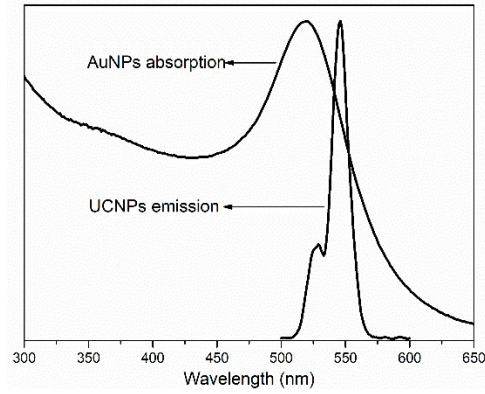

**Fig. S1** The fluorescence emission spectrum of UCNPs and the UV-vis absorption spectrum of AuNPs.

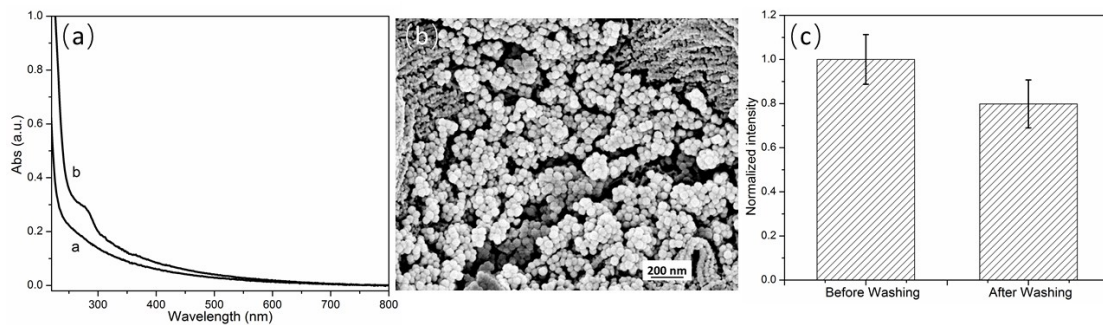

**Fig. S2** (a) The UV-vis absorption spectra of UCNPs (curve a) and the UCNPs-CEA Ab 1 (curve b). (b) The SEM image of the as-prepared UCNPs-CEA Ab 1 immobilized on the surface of paper. (c) The normalized intensity of UCNPs-CEA Ab 1 on the surface of paper before and after washing by PBS buffer for several times. The luminescence intensity was normalized to the intensity before washing. Data are presented as the average  $\pm$  SD from three independent measurements.

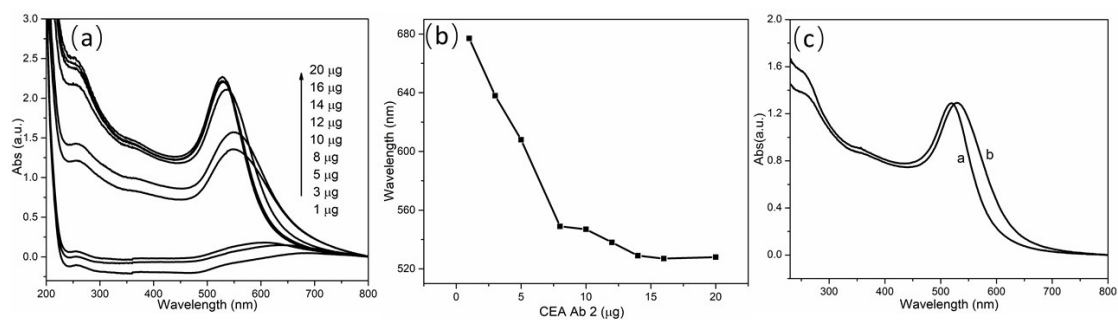

**Fig. S3** (a) The UV-vis absorption spectra of AuNPs conjugated with the increasing amounts of CEA Ab 2 (1, 3, 5, 8, 10, 12, 14, 16, 20 μg, respectively). (b) The peak position corresponding to the maximum absorption of AuNPs conjugated with the increasing amounts of CEA Ab 2 (1, 3, 5, 8, 10, 12, 14, 16, 20 μg, respectively). (c) The UV-vis absorption spectra of AuNPs (curve a) and AuNPs-CEA Ab 2 (curve b) conjugated with 16.8 μg CEA Ab 2.

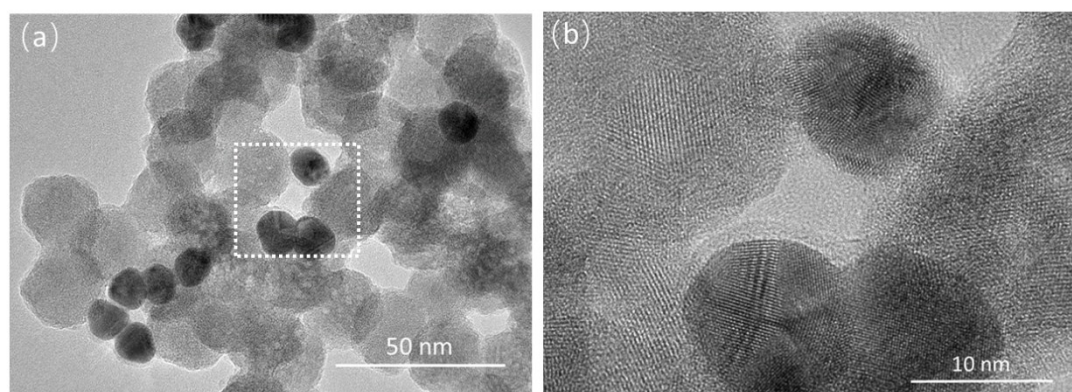

**Fig. S4** (a) TEM image of UCNPs-CEA Ab 1-CEA-AuNPs-CEA Ab 2 complex. (b) HRTEM image of UCNPs-CEA Ab 1-CEA-AuNPs-CEA Ab 2 complex.

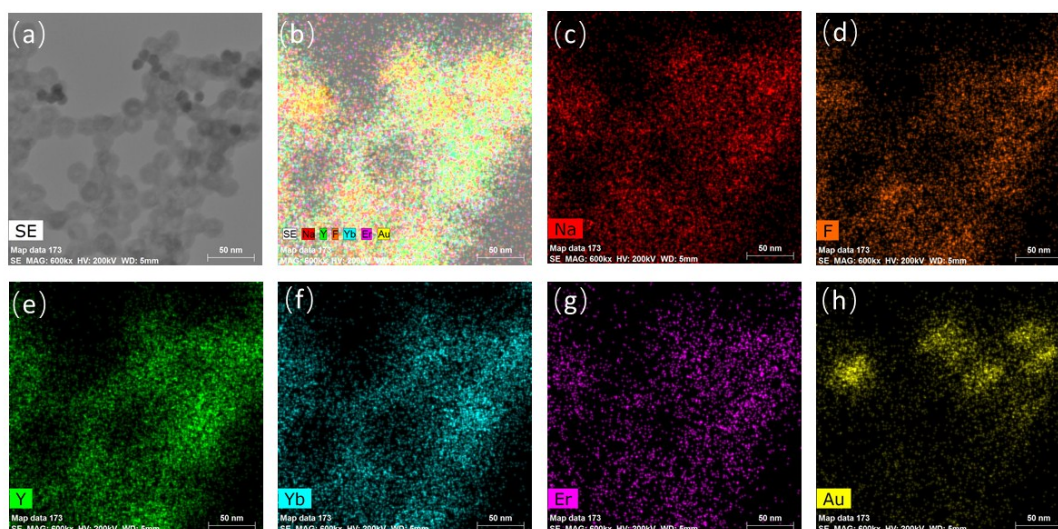

**Fig. S5** EDX element mapping analysis of UCNPs-CEA Ab 1-CEA-AuNPs-CEA Ab 2 complex.

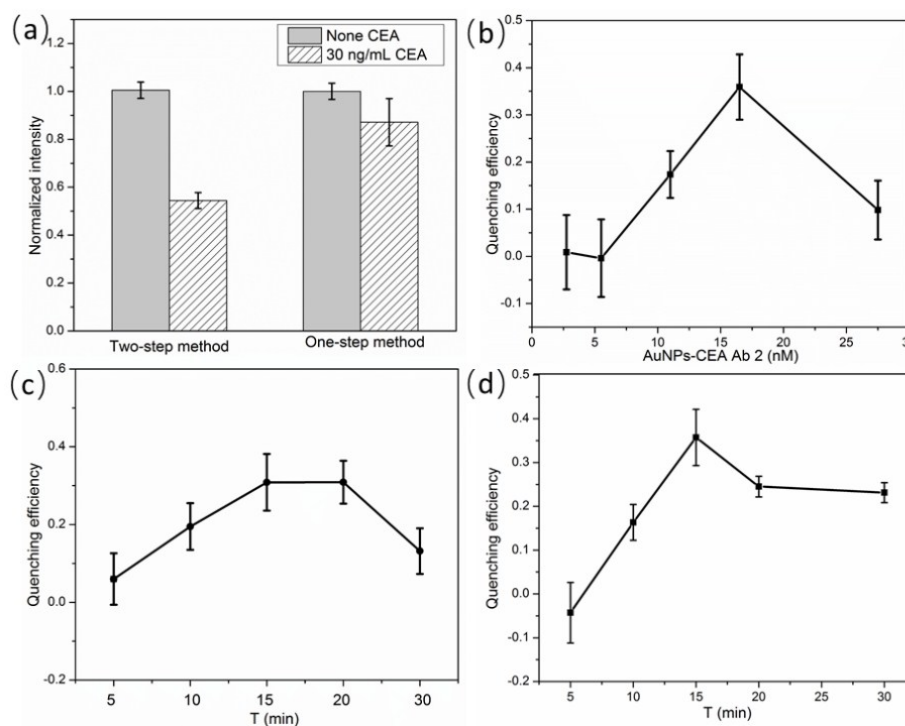

**Fig. S6** (a) The normalized intensity in the test zones with 0 and 30 ng/mL CEA and 16.5 nM AuNPs-CEA Ab 2, in which CEA and AuNPs-CEA Ab 2 were added separately and simultaneously. (b) The quenching efficiency in the test zones with 20 ng/mL CEA and different amounts of AuNPs-CEA Ab 2 (0, 5.5, 11, 16.5, 27.5 nM). (c) CEA reaction time dependence of quenching efficiency in the test zones with 20 ng/mL CEA and 16.5 nM AuNPs-CEA Ab 2. (d)

AuNPs-CEA Ab 2 reaction time dependence of quenching efficiency in the test zones with 20 ng/mL CEA and 16.5 nM AuNPs-CEA Ab 2.

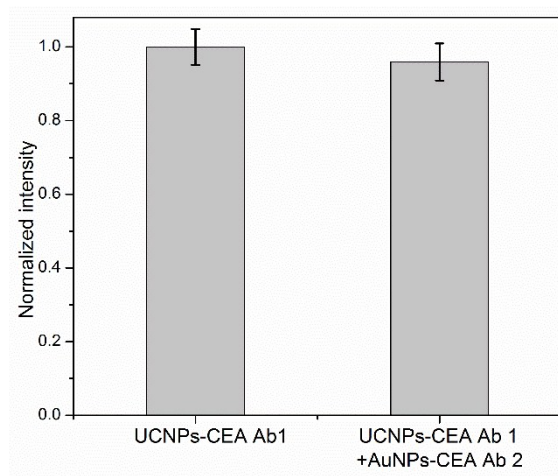

**Fig. S7** The normalized intensity of UCNPs-CEA Ab 1 on the surface of paper before and after added 16.5 nM AuNPs-CEA Ab 2, which were washing by PBS buffer for several times. The luminescence intensity was normalized to the intensity without AuNPs-CEA Ab 2. Data are presented as the average  $\pm$  SD from three independent measurements.

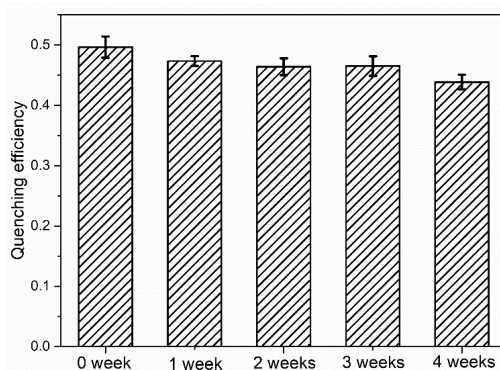

**Fig. S8** The quenching efficiency in the test zones with 30 ng/mL CEA and 16.5 nM AuNPs-CEA Ab 2, which were kept in 4°C dry environment for different time. Data are presented as the average  $\pm$  SD from three independent measurements.

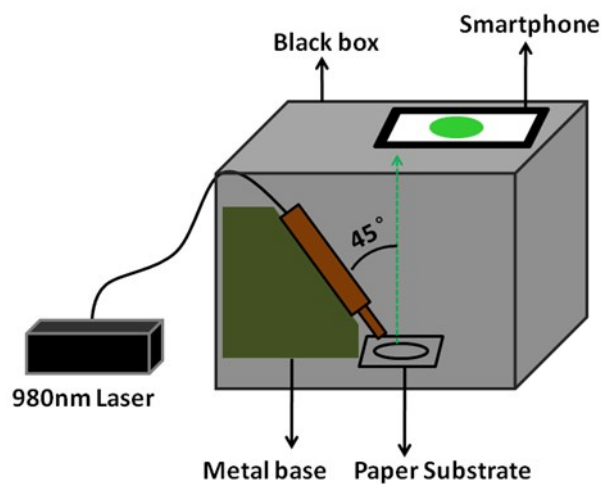

**Fig. S9** Illustration of the self-made device for the collection of upconversion luminescence images, which consists of a 980 nm diode laser as the light source, a homemade metal base as sample holder, a black box and a smartphone.

**Table S1** A detailed comparison on analytical performance for CEA detection between previously reported methods and this method.

| Detection methods               | Probes                               | Linear range (ng/mL) | LOD (ng/mL) | Detection time (h) | Ref. |
|---------------------------------|--------------------------------------|----------------------|-------------|--------------------|------|
| Fluorescence Immunoassay        | UCNPs/magnetic beads                 | 0.05-20              | 0.05        | >2.5               | [1]  |
| Homogeneous UC-FRET             | UCNPs/CNPs                           | 0.1-40               | 0.1         | 3                  | [2]  |
| Homogeneous UC-FRET             | UCNPs/AuNPs                          | 0.05-2               | 0.02        | 2.5                | [3]  |
| Photoelectrochemical Aptasensor | UCNPs@TiO <sub>2</sub> microrods/RCA | 0.01-40              | 0.0036      | 6                  | [4]  |
| Photoelectrochemical Aptasensor | UCNPs/Ag <sub>2</sub> S/H CR         | 0.005-5.0            | 0.0019      | 2.5                | [5]  |

|                                    |             |        |      |               |           |
|------------------------------------|-------------|--------|------|---------------|-----------|
| Paper-based UC-FRET                | UCNPs/AuNPs | 1-100  | 0.89 | Not mentioned | [6]       |
| FRET-based lateral flow test strip | FITC/AuNPs  | 5-80   | 5    | 0.08          | [7]       |
| Paper-based UC-FRET                | UCNPs/AuNPs | 0.5-30 | 0.21 | <1            | This work |

## References

- [1] Y. H. Li, Z. J. Wu, Z. H. Liu, *Analyst*, 2015, 140, 4083.
- [2] Z. J. Wu, H. Li, Z. H. Liu, *Sensors and Actuators B*, 2015, 206, 531.
- [3] X. Li, W. Sun, J. Wu, Y. Gao, J. Chen, M. Chen, Q. Ou, *Anal. Methods*, 2018, 10, 1552.
- [4] Z. L. Qiu, J. Shu, D. P. Tang, *Anal. Chem.*, 2018, 90, 1021.
- [5] Z. L. Qiu, J. Shu, D. P. Tang, *Anal. Chem.*, 2018, 90, 12214.
- [6] S. Xu, B. Dong, D. L. Zhou, Z. Yin, S. B. Cui, W. Xu, B. J. Chen, H. W. Song, *Sci. Rep.*, 2016, 23406.
- [7] J. D. Wang, F. J. Cao, S. L. He, X. Y. Liu, W. X. Jiang, Y. Y. Yu, H. S. Zhang, W. W. Chen, *Talanta*, 2018, 176, 444.
